# Supplementary material for: Cyber-attack research for integrated energy systems by the correlated matrix based object-oriented modeling method
Source: Frontiers journal article supplement (doi:10.3389/fenrg.2022.774645), 2022-08-19
Supplement: Data_Sheet_1.pdf [file Data_Sheet_1.pdf]

## Supplementary Material

### 1 Supplementary Figures and Tables

#### 1.1 Supplementary Figures 1. The diagram of object-oriented method for the cyber-attack modeling

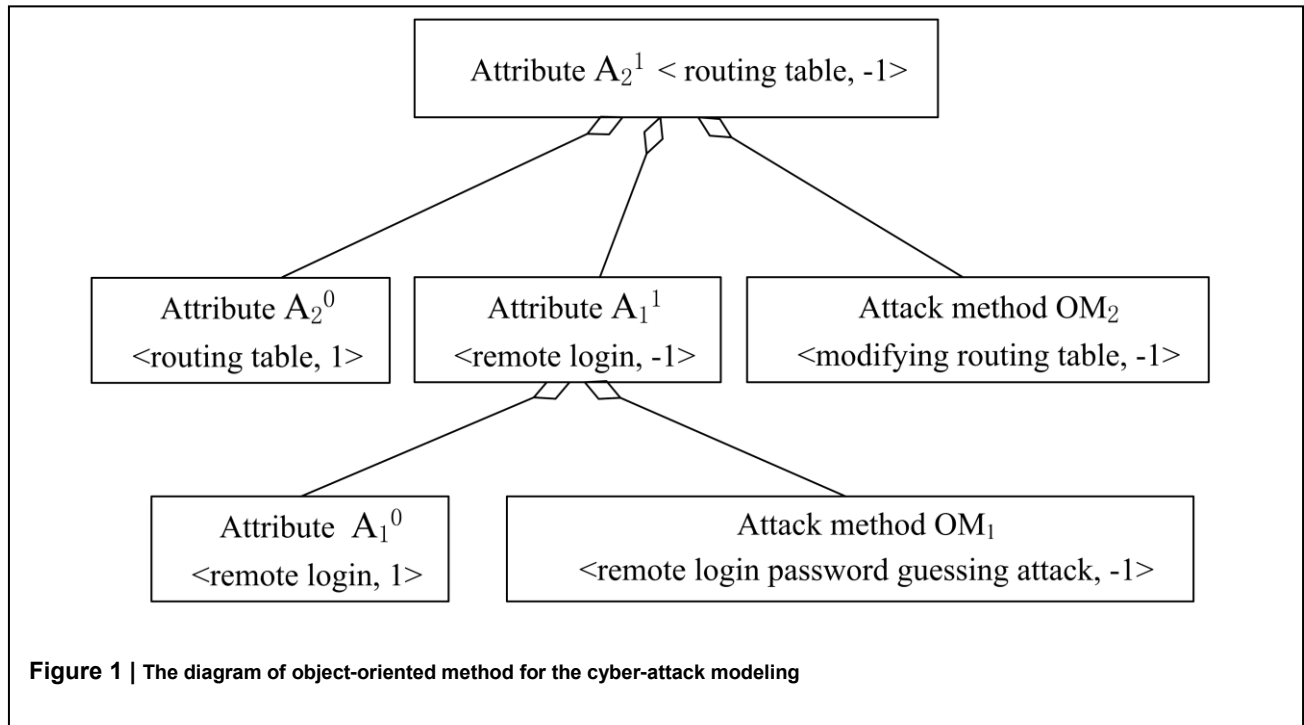

#### 1.2 Supplementary Figures 2. The topology of communication network

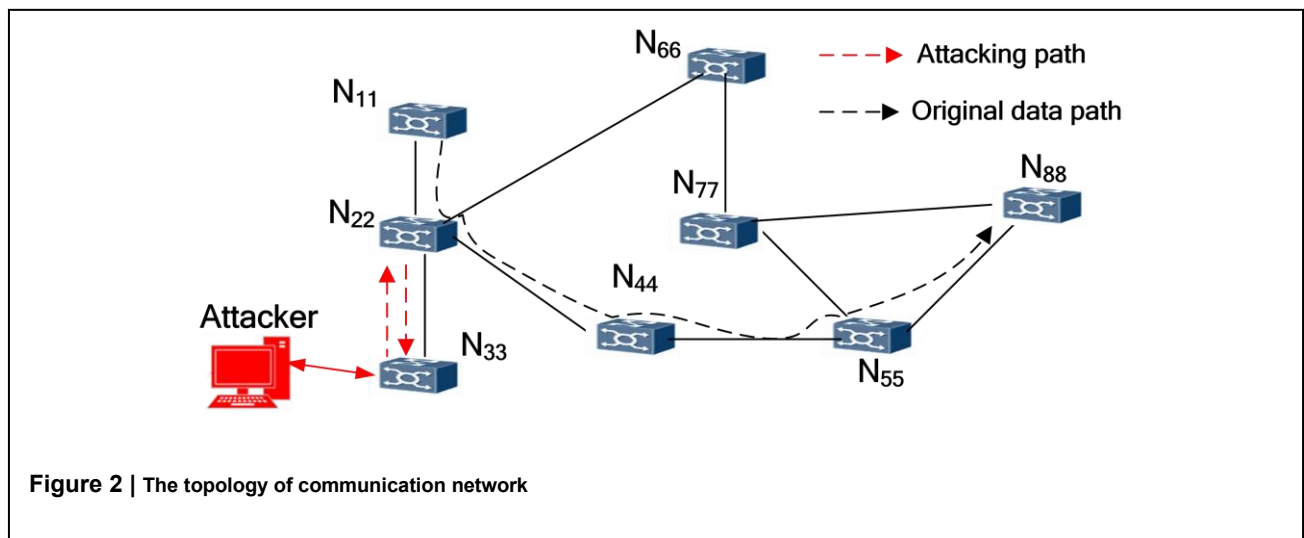

### 1.3 Supplementary Figures 3. The diagram of cyber-attack model

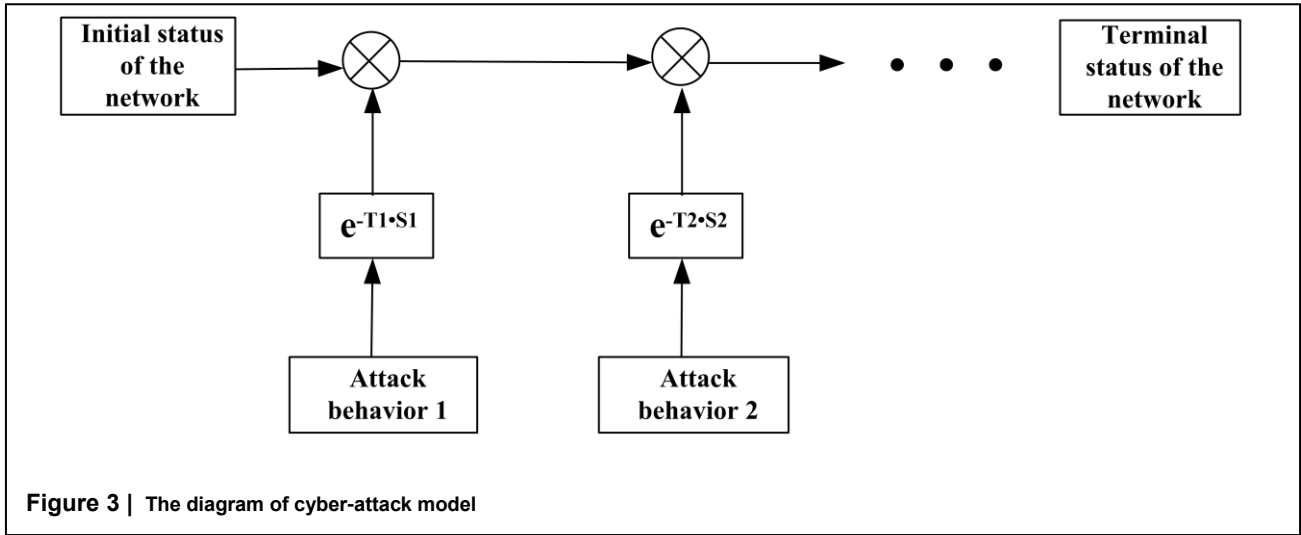

### 1.4 Supplementary Figures 4. The topology of communication network for AVC control

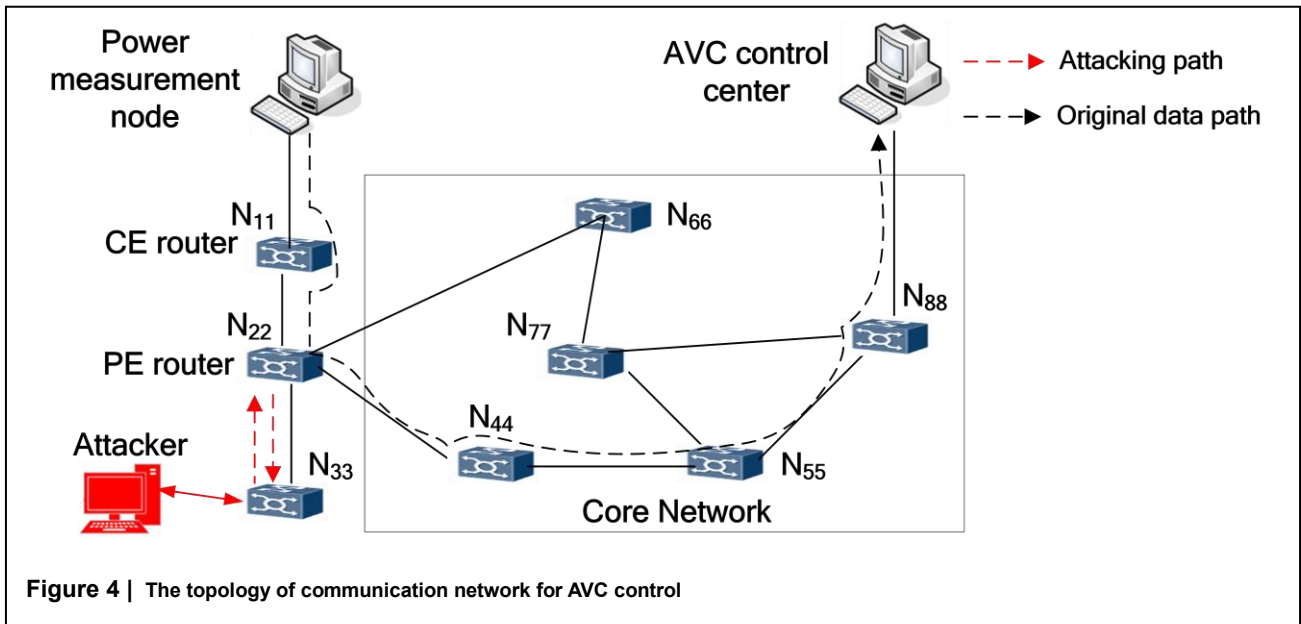

### 1.5 Supplementary Figures 5. The diagram of logical matching method for the matrix of $N_{22}^0$ and $ON_{22}^0$

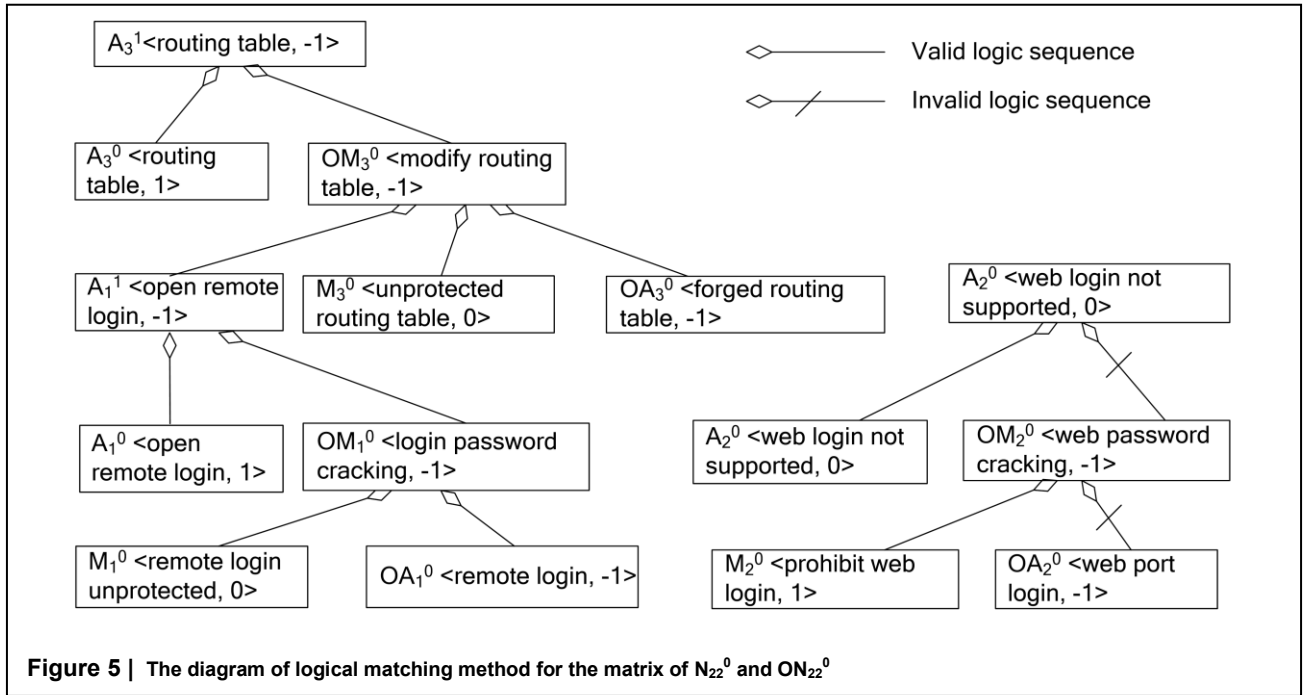

### 1.6 Supplementary Figures 6. The diagram of logical matching method for the matrix of $N_{33}^0$ and $ON_{33}^1$

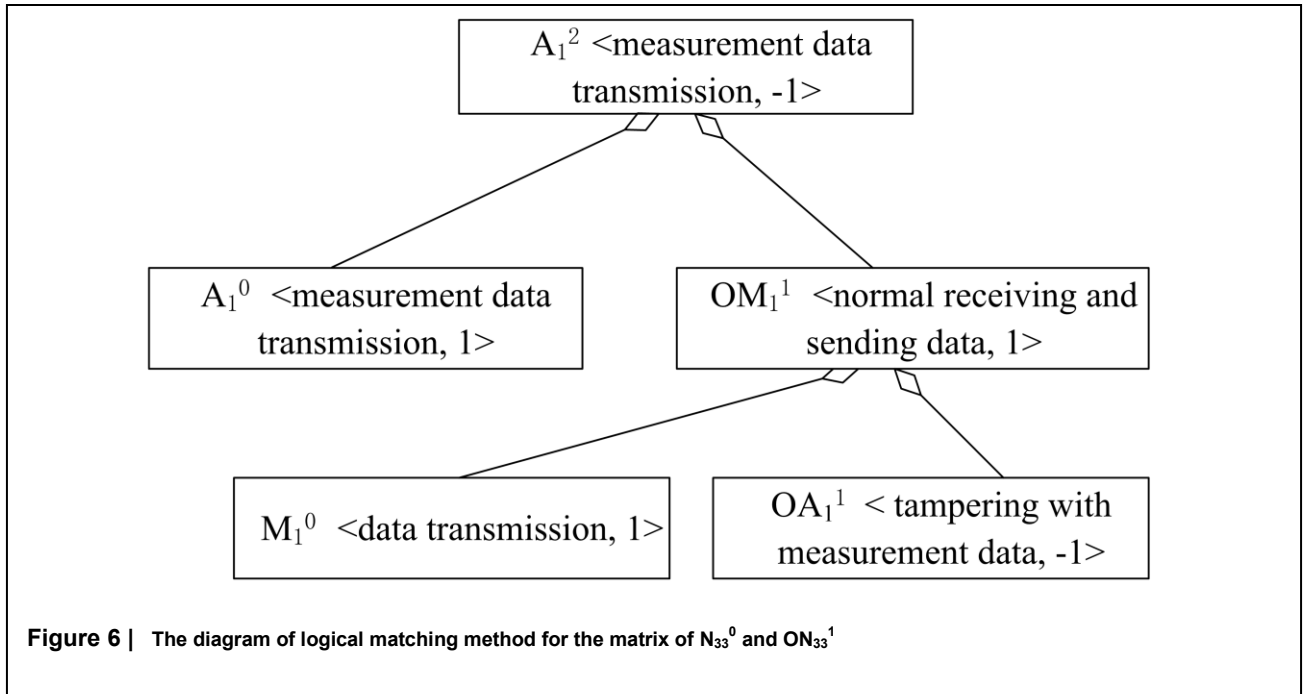

### 1.7 Supplementary Figures 7. The architecture of co-simulation system for the MITM attack

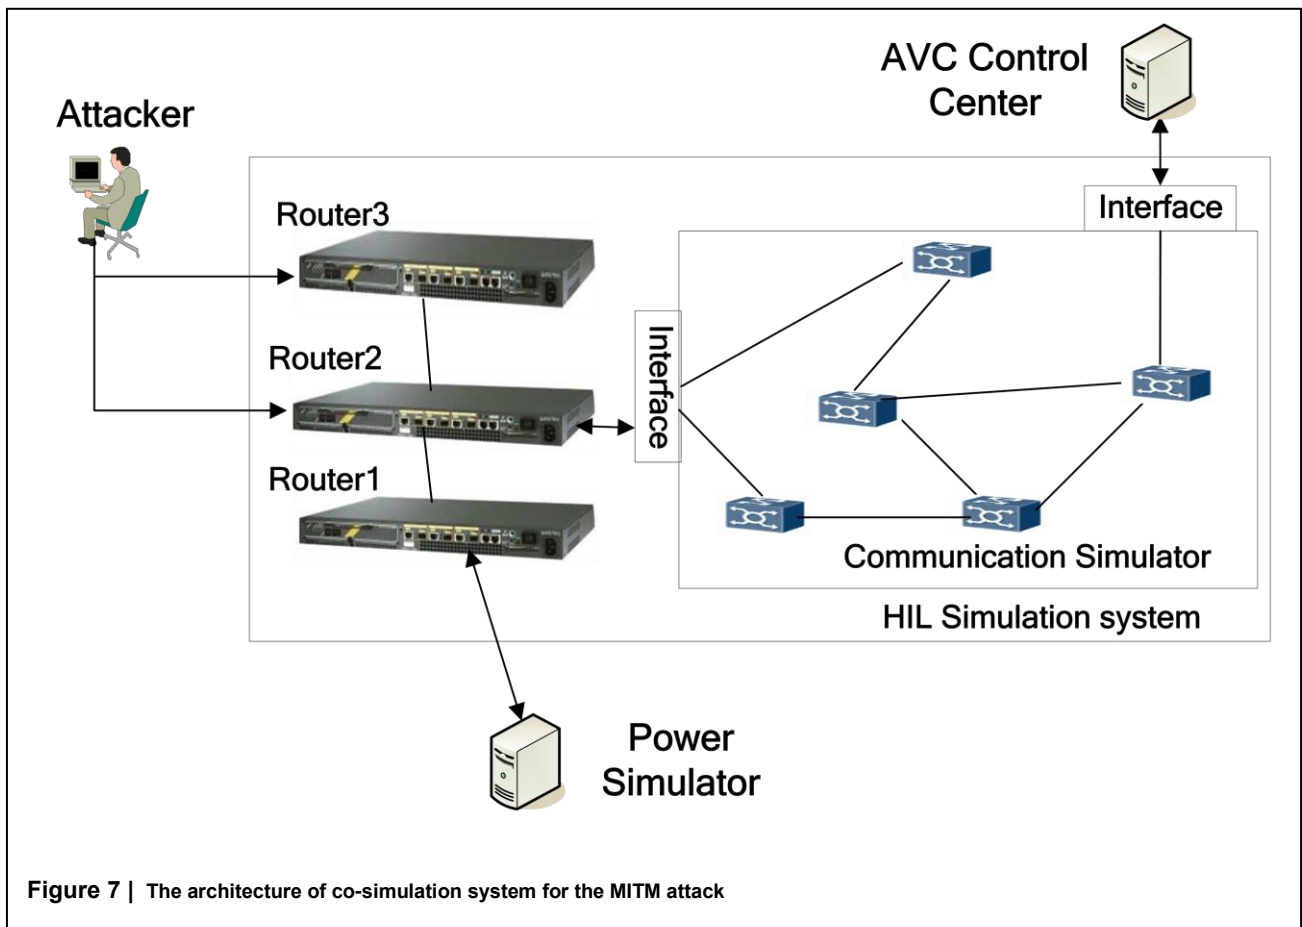

## 1.8 Supplementary Figures 8. Topology of IEEE 39-bus system

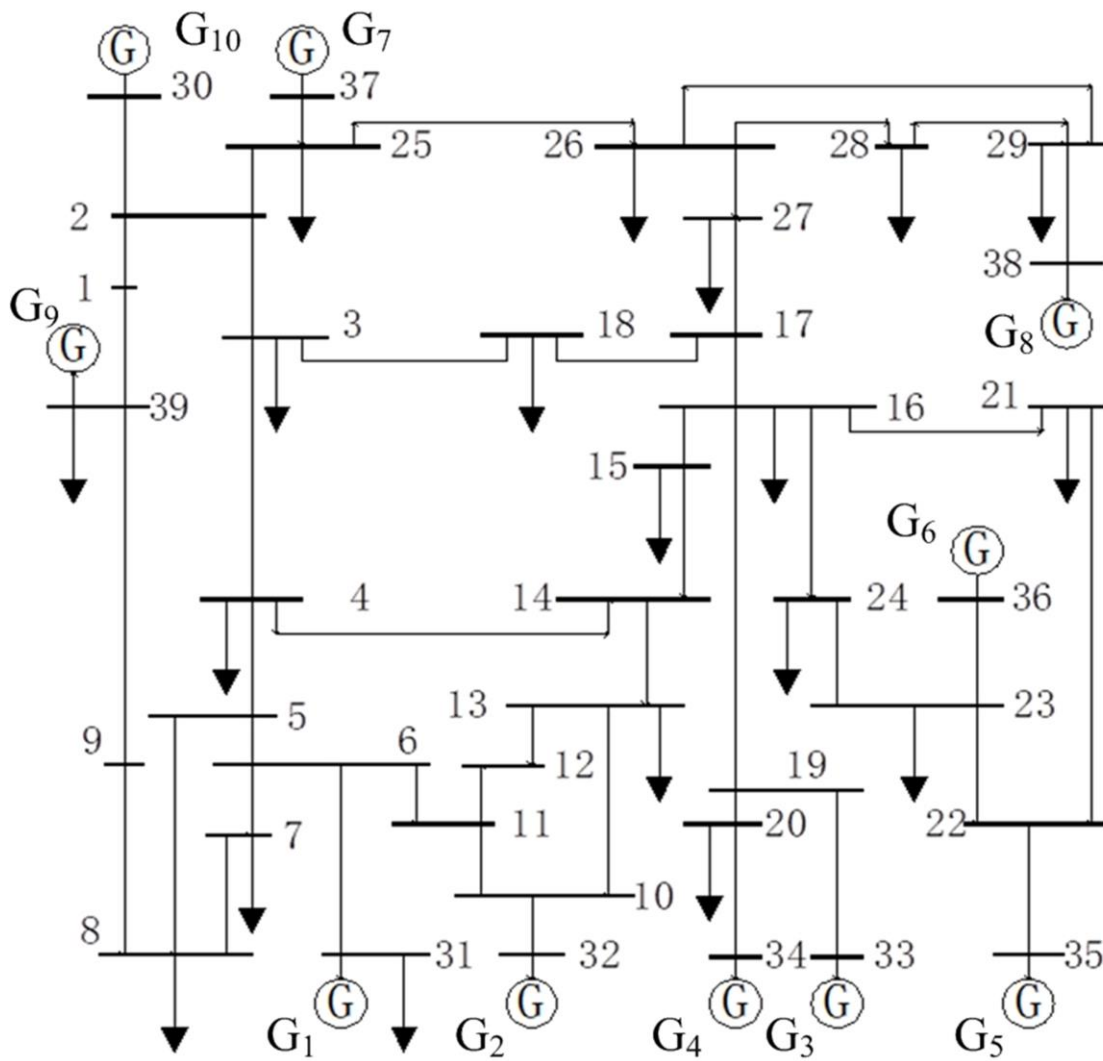

Figure 8 | Topology of IEEE 39-bus system

## 1.9 Supplementary Figures 9. Result of simulation

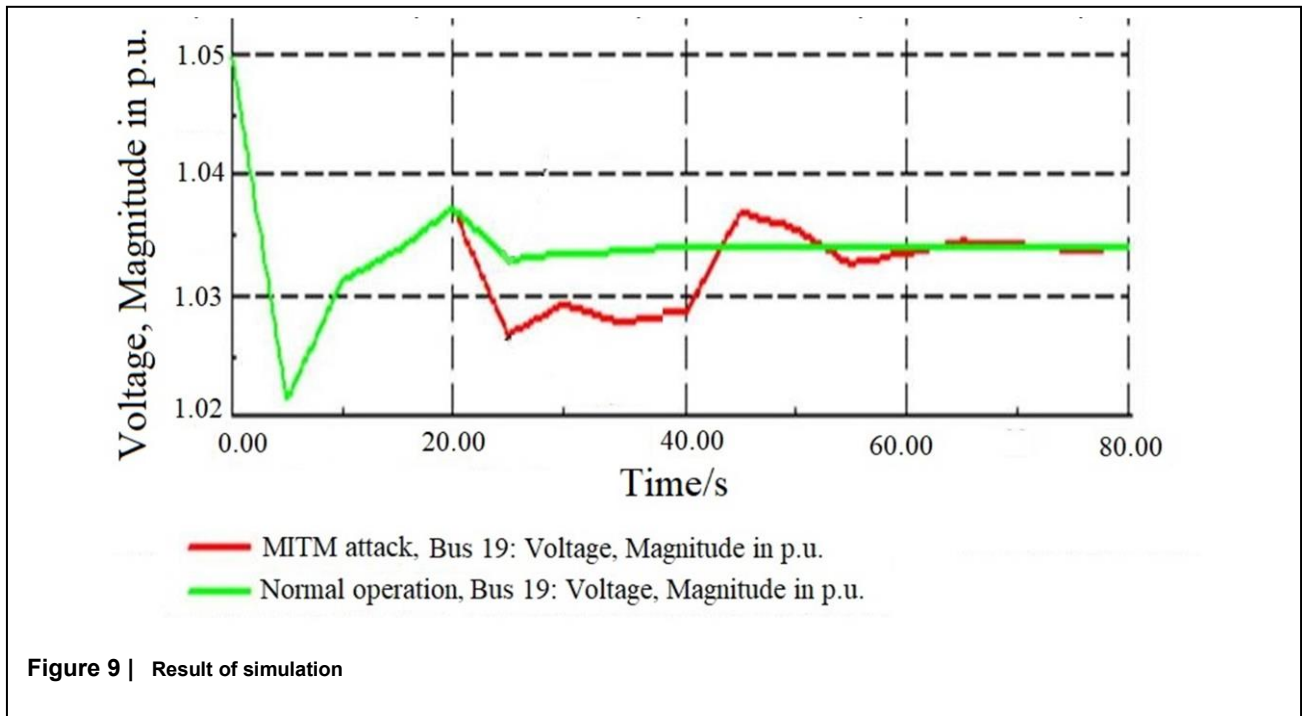

### 1.10 Supplementary Table 1. Comparison of modeling method

| Modeling method                                      | Description of network topology | Description of changes of nodes status | Description of nodes weakness | Description of attack dynamic behavior | Description of attack propagation path |
|------------------------------------------------------|---------------------------------|----------------------------------------|-------------------------------|----------------------------------------|----------------------------------------|
| <i>Attack tree model</i>                             | None                            | None                                   | None                          | None                                   | None                                   |
| <i>Attack graph model</i>                            | None                            | None                                   | None                          | None                                   | None                                   |
| <i>Attack network model based on Petri Net</i>       | Partial                         | None                                   | None                          | Yes                                    | No<br>Partial                          |
| <i>Network Attack Language</i>                       | None                            | Partial                                | Partial                       | Partial                                | None                                   |
| <i>State transition graph modeling</i>               | None                            | Yes                                    | Partial                       | Yes                                    | Yes<br>Partial                         |
| <i>Correlated matrix based object-oriented model</i> | Yes                             | Yes                                    | Yes                           | Yes                                    | Fully displayed                        |
